# Supplementary material for: The Glyoxalase System Is a Novel Cargo of Amniotic Fluid Stem-Cell-Derived Extracellular Vesicles
Source: MDPI journal article supplement (doi:10.3390/antiox11081524), 2022-08-05

# Supplementary Material: The glyoxalase system is a novel cargo of amniotic fluid stem cell-derived extracellular vesicles

Rita Romani, Vincenzo N. Talesa and Cinzia Antognelli

Figure S1. Whole blots reported in Figure 1a, Figure 3a, Figure 4, Figure 5a.

Figure 1a

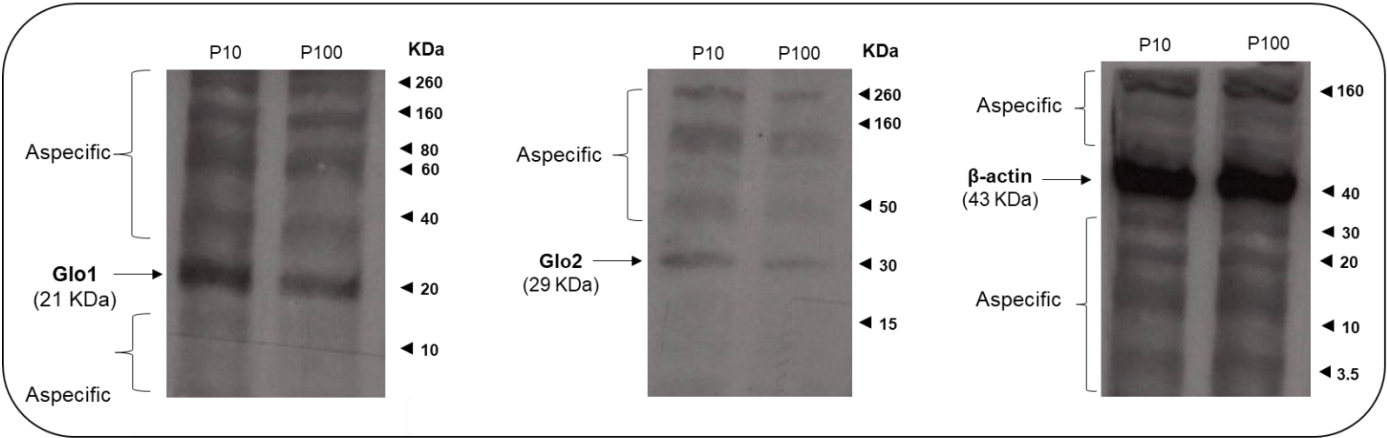

Figure 3a

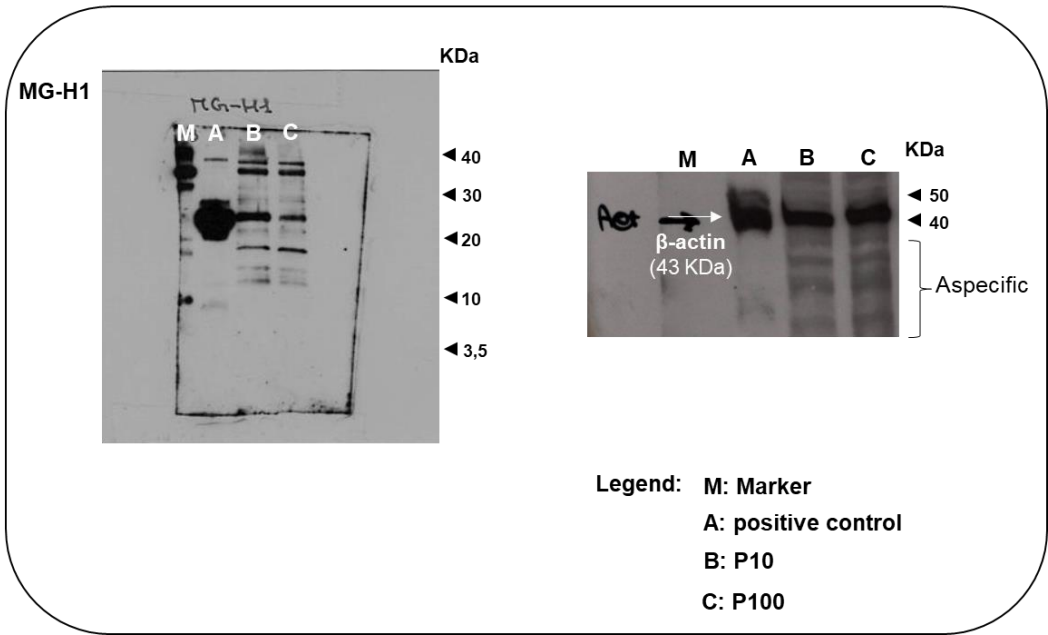

Figure 4

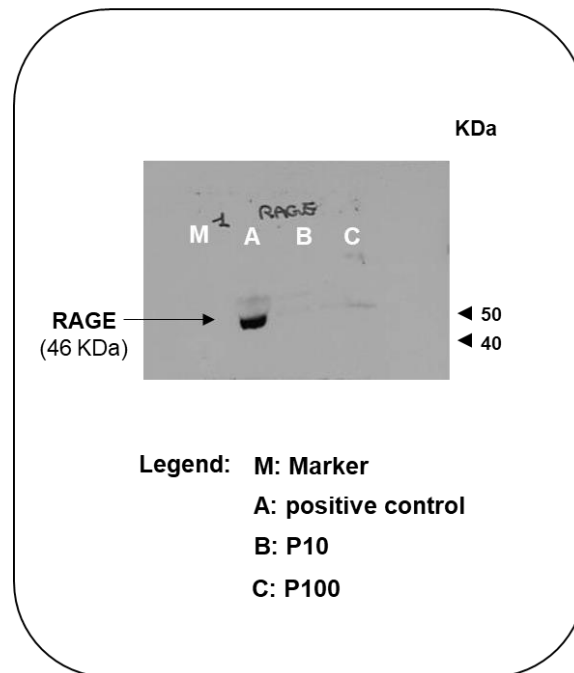

Figure 5a

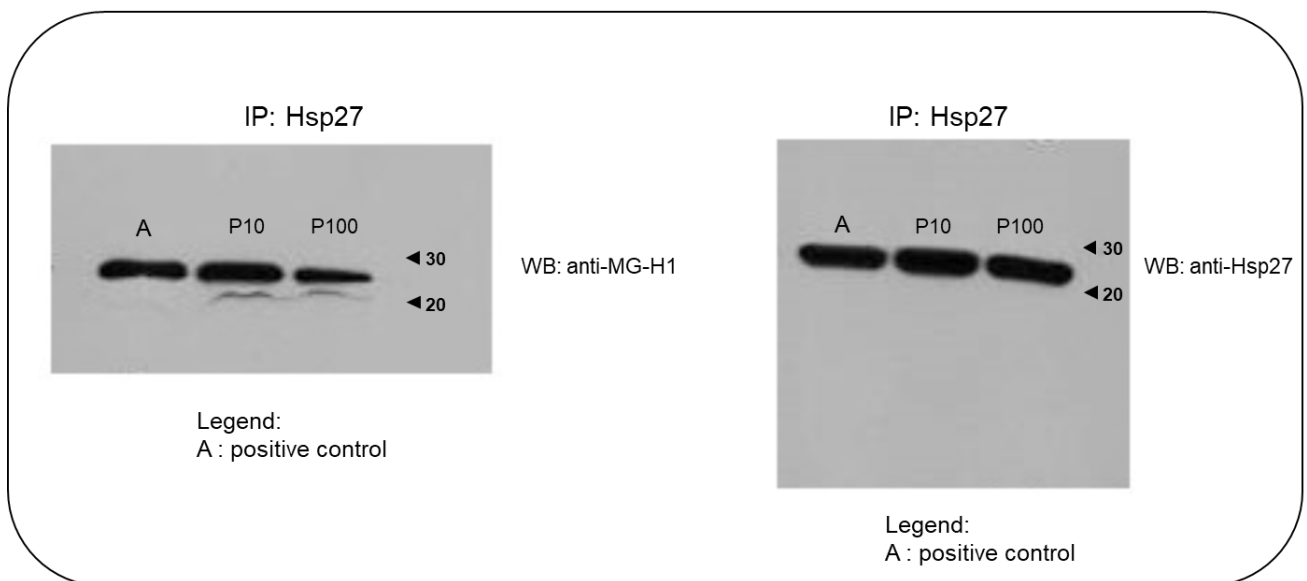

Supplement: s1 [file s1]
